# Supplementary material
Source: Springer Nature journal article supplement (https://www.springermedizin.de/resource/supplementary/12936_2010_1225_MOESM1_ESM.pdf/9549262)
Supplement: MOESM1 [file 9549262]

**Access to prompt effective malaria treatment**

**Affordability**

- Cost of treatment (official and non-official)
- Seasonality of illness and income
- Drug shortages
- Organisation of health care services
- Transport costs

**Acceptability**

- Cost of treatment
- Illness perceptions
- Effectiveness of treatment
- Distrust in the health system
- Provider patient interactions
- Drug shortages
- Drug adherence
- Perceived low quality of care
- Gender roles

**Availability**

- Cost of treatment
- Distance
- Poor infrastructure
- Drug shortages
- Opening hours
- Staff shortages
- Provider attitudes
- Poor work ethics
- Organisation of health care services

Broader health system factors including poor remuneration of health workers, high work load, staff shortage, distrust in the public health system
